# 1 **Theta phase mediates deliberate action switching in human**

## 2 **Supplementary Motor Areas**

3

4 Giovanni Maffei<sup>1,2,\*</sup>, Riccardo Zucca<sup>1,3</sup>, Jordi-Ysard Puigbò<sup>1,2</sup>, Diogo Santos-Pata<sup>1</sup>, Marco  
5 Galli<sup>1</sup>, Adrià Tauste Campo<sup>2</sup>, Rodrigo Rocamora<sup>2,3</sup>, Paul Verschure<sup>1,4,\*</sup>

6

7 <sup>1</sup> SPECS Lab., Institute of Bioengineering of Catalonia (IBEC), Barcelona Institute of Science and Technology  
8 (BIST), Barcelona, Spain

9 <sup>2</sup> Universitat Pompeu Fabra (UPF), Barcelona, Spain

10 <sup>3</sup> Epilepsy Monitoring Unit, Department of Neurology, Hospital del Mar Medical Research Institute, Barcelona,  
11 Spain

12 <sup>4</sup> Institutio´ Catalana de Recerca i Estudis Avancats (ICREA), Barcelona, Spain

13 \* Corresponding authors: [giovanni.maffei@upf.edu](mailto:giovanni.maffei@upf.edu), [pverschure@ibebarcelona.eu](mailto:pverschure@ibebarcelona.eu)

14

### 15 **ABSTRACT**

16

17 The ability to deliberately overwrite ongoing automatic actions is a necessary feature of adaptive  
18 behavior. It has been proposed that the supplementary motor areas (SMAs) operate as a controller  
19 that orchestrates the switching between automatic and deliberate processes by inhibiting ongoing  
20 behaviors and so facilitating the execution of alternative ones. In addition, previous studies support  
21 the involvement of SMAs theta waves (4-9 Hz) in cognitive control. However, the exact role of such  
22 oscillatory dynamics and their contribution to the control of action are not fully understood. To  
23 investigate the mechanisms by which the SMAs support direct control of deliberate behavior, we  
24 recorded intracranial electroencephalography (iEEG) activity in humans performing a motor  
25 sequence task. Subjects had to perform a “change of plans” motor task requiring habitual  
26 movements to be overwritten at unpredictable moments. We found that SMAs were exclusively  
27 active during trials that demand action reprogramming in response to the unexpected cue but were  
28 silent during automatic action execution. Importantly, SMAs activity was characterized by a distinct  
29 temporal pattern, expressed in a stereotypical phase alignment of theta oscillations. More  
30 specifically, single trial motor performance was correlated with the trial contribution to the global  
31 inter-trial phase coherence, with higher coherence associated with faster trials. In addition, theta  
32 phase modulated the amplitude of gamma oscillations, with higher cross-frequency coupling in faster  
33 trials. Our results suggest that within frontal cortical networks, theta oscillations could encode a  
34 control signal that promotes the execution of deliberate actions.

35

## 36 INTRODUCTION

37

38 The ability to deliberately interrupt and overwrite ongoing actions as a response to external cues is a  
39 necessary feature of cognitive control. For example, when driving a car on a known route, we  
40 automatically perform highly trained actions to reach a familiar destination. However, if the habitual  
41 route is found blocked, the automatic driving routines are promptly interrupted, and a new motor  
42 program is deliberately assembled and selected to follow an alternative path to the goal.

43 The Supplementary Motor Areas (SMAs), in the Medial Frontal Cortex (MFC), are thought to mediate  
44 the switch from automatic to deliberate control when a conflict between current and expected  
45 contingencies is detected which requires alterations in ongoing actions (1–5). In particular, it has  
46 been suggested that the SMAs orchestrate the balancing of automatic and deliberate processes by  
47 inhibiting ongoing motor routines to facilitate the execution of alternative deliberate actions (4,5).  
48 Animal studies support this hypothesis, for instance, by showing the involvement of neurons in the  
49 primate SMAs in either suppressing or promoting action during “change of plans” paradigms (6).  
50 Nevertheless, the functional role of SMAs in humans is still under debate. Imaging studies have  
51 reported increased activation of the human pre-SMAs and SMAs during action reprogramming but  
52 not during automatic action execution (1). This is consistent with rare lesion studies where subjects  
53 suffering from focal SMAs damage are able to stop an action but unable to switch between automatic  
54 and deliberate control (7). These results suggest that human SMAs are not generally involved in  
55 action inhibition but are specifically supporting switching behavior. However, this interpretation  
56 seems at odds with findings from human EEG studies showing significant activation of the medial  
57 frontal cortex (MFC) during a behavioral conflict. Here, a positive relationship between the power  
58 increase in the theta range (4-8 Hz) and response time during high-conflict trials suggests that this  
59 frequency band (often termed 'frontal theta') could reflect a generic inhibitory mechanism, possibly  
60 acting as a “global brake” on the motor system both pro- and retrospectively (i.e. post-error slowing)  
61 (8–10). Hence, the exact role of human SMAs in cognitive control is not clear and pointing to a  
62 plurality of possible functions.

63 A second topic of debate pertains to the mechanism through which the SMAs can control action  
64 execution. Indeed, although the power of the theta band over the motor system could reflect an  
65 inhibitory mechanism, recent evidence suggests that the phasic period of frontal theta is crucially  
66 related to performance in cognitive tasks that involve frontal cortical circuits (11). In particular, theta  
67 band phase coherence within and across frontal, motor and parietal regions seems to correlate with a  
68 higher accuracy in rule-based decision making (12,13) and memory tasks (14), as well as shorter  
69 reaction times during attentional paradigms (15). Despite this growing body of evidence, a direct link  
70 between theta oscillatory phase and the executive control of action is still missing (although see  
71 (16)). In summary, it remains unclear whether the human SMAs are involved in behavioral switching,  
72 whether they have an inhibitory or facilitatory role in action reprogramming and what is the neural

73 mechanism is underlying this putative role. To address these questions, we tested the ability to  
74 switch between automatic and deliberate control of action in three (pre-operation) epileptic subjects  
75 with iEEG medial-frontal implants in the supplementary motor areas (BA6). Subjects performed a  
76 variation of the Serial Reaction Time Task (SRTT) (17), a paradigm that requires the execution of a  
77 sequence of repetitive visually-guided key-presses, which becomes progressively automated. In a  
78 small subset of trials, the automatic sequence is unpredictably interrupted by the appearance of a cue  
79 (switch trials), which required the subjects to halt the ongoing action sequence and press an  
80 alternative un-cued key (switch trials).

81 Consistently with the animal literature (4,6), we find that the SMAs are active during switch trials but  
82 not during automatic ones. We also observe that the response time at the single trial level can be  
83 predicted from the movement related cortical potential (MRCP) (18). Notably, the ability to detect  
84 MRCP peaks at the single trial level allowed us to align the iEEG signals recorded from the SMAs to an  
85 endogenous neural event predictive of behavior. This was crucial to minimize intra- and inter-subject  
86 variability (19) and to unveil the intrinsic neural dynamics independent of an exogenous (i.e. cue  
87 presentation) event-locked analysis (12,20,21). We show that the single-trial theta band phase  
88 coherence (22,23), i.e. the contribution of a single trial to the overall phase consistency across trials,  
89 were predictive of motor performance at the single trial level, with higher phase coherence  
90 correlating with shorter reaction times. Neither amplitude nor power of the MRCP had such  
91 predictive power. To further investigate the neurophysiological link between low-frequency  
92 oscillations and behavior, we computed the cross-frequency coupling between theta phase and the  
93 amplitude of higher frequency activity. This analysis revealed a significant increase of theta-gamma  
94 phase-amplitude coupling associated with shorter response latencies suggesting a modulatory effect  
95 of theta rhythms on local neuronal activity.

96 Altogether our results directly support the role of human SMAs in the control of action switching.  
97 Moreover, they reveal a possible mechanism of cognitive control based on the entrainment of high-  
98 frequency neuronal events by low-frequency oscillations in a cognitive control version of the nested  
99 frequency theta-gamma code (24). This interpretation provides further support for the growing body  
100 of evidence pointing to the role of phase synchrony and modulation in the theta band as a  
101 fundamental operational mode of frontal executive function.

102

103

## 104 **RESULTS**

105

### 106 **Task and behavioral results**

107

108 In order to explore the neural dynamics underlying behavioral performance in deliberate action  
109 switching, three human subjects implanted with intracranial electrodes (iEEG) in the supplementary

110 motor areas (SMAs) (fig. 1-B), performed a variation of the serial reaction time task (17,25) (fig. 1-A).  
111 The task was composed of two consecutive blocks for a total of 565 trials. The first block (trial 1-60)  
112 required the participants to learn to perform a repetitive sequence of key-presses (N=5) on a touch-  
113 screen keyboard by tapping on a visual cue (green, presented for 500 msec or until pressed) until  
114 they reached automaticity. Automaticity was defined as the decrease of inter-key-interval (IKI) to an  
115 asymptotic value, indicating that the subject effectively internalized the motor sequence and did not  
116 rely on visual feedback (17) (fig. 1-C). We observed a significant decrease in IKI between early and  
117 late training trials (fig. 1-D) (t-test unpaired between trials 1-20 (N=20) and trials 40-60 (N=20):  
118 SBJ1,  $t=5.30$ ,  $p<10^{-05}$ ; SBJ2,  $t=5.71$ ,  $p<10^{-05}$ ; SBJ3,  $t=4.08$ ,  $p<10^{-03}$ ) and its variability (fig. 1-E) (t-test  
119 unpaired: SBJ1,  $t=2.21$ ,  $p=0.04$ ; SBJ2,  $t=2.45$ ,  $p=0.02$ ; SBJ3,  $t=3.28$ ,  $p=0.004$ ), confirming that the  
120 subjects performed the sequence in an automatic manner (26).

121 In the second block of the task (trial 61-565), subjects were required to perform the learned  
122 sequence of visually guided key presses. However, these were interrupted by the unpredictable  
123 appearance of a switch cue (red circle) at pseudo-random intervals ( $7 \pm 2$  sec). When the switch cue  
124 appeared, subjects had to interrupt their ongoing automatic motor sequence and press a specific  
125 uncued key (fixed for each subject throughout the experiment) as instructed during the training  
126 phase (switch trials). Subject 1 and 2 requested to interrupt the experiment prematurely. In total we  
127 collected 50 switch trials for SBJ1, 57 for SBJ2 and 80 for SBJ3. Subjects were able to successfully  
128 interrupt the ongoing action sequence for most of the switch trials. Switch trials where subjects  
129 failed to interrupt the ongoing motor sequence and pressed the next key in the sequence (SBJ1, 14%;  
130 SBJ2, 20%; SBJ3, 10%) were excluded from the analysis. The behavioral analysis of the key-presses  
131 showed consistently longer response in switch trials compared to automatic response trials (fig. 1-F)  
132 (t-test unpaired: SBJ1,  $t=-39.59$ ,  $p<0.01$ ; SBJ2,  $t=-32.96$ ,  $p<0.01$ ; SBJ3,  $t=-71.56$ ,  $p<0.01$ ). This  
133 increased latency in response time was accompanied by a greater variability ranging from about 600  
134 to 1300 ms (fig. 1-G). Hence, the motor response dynamics in automatic trials were consistent and  
135 stereotyped whereas in switch trials subjects were variably faster or slower than their mean  
136 performance at each trial. This difference cannot be explained as a learning effect, as we did not find  
137 a significant correlation between trial order and switch response latencies (Pearson's correlation  
138 coefficient: SBJ1:  $R=-0.11$ ,  $p=0.18$ ; SBJ2:  $R=0.08$ ,  $p=0.37$ ; SBJ3:  $R=-0.16$ ,  $p=0.07$ ). In addition, it cannot  
139 be consistently explained by the position of the switch cue within the sequence, which showed a  
140 significant effect only in one subject (one way ANOVA: SBJ1:  $F(2,40)=2.546$ ,  $p=0.091$ ;  
141 SBJ2: $F(2,43)=2.002$ ,  $p=0.147$ ; SBJ3: $F(2,69)=4.685$ ,  $p=0.012$ ). This raises the question whether the  
142 difference in performance in automatic and switch trials can be explained in terms of the properties  
143 of the neuronal process underlying the control of action switching.

144  
145

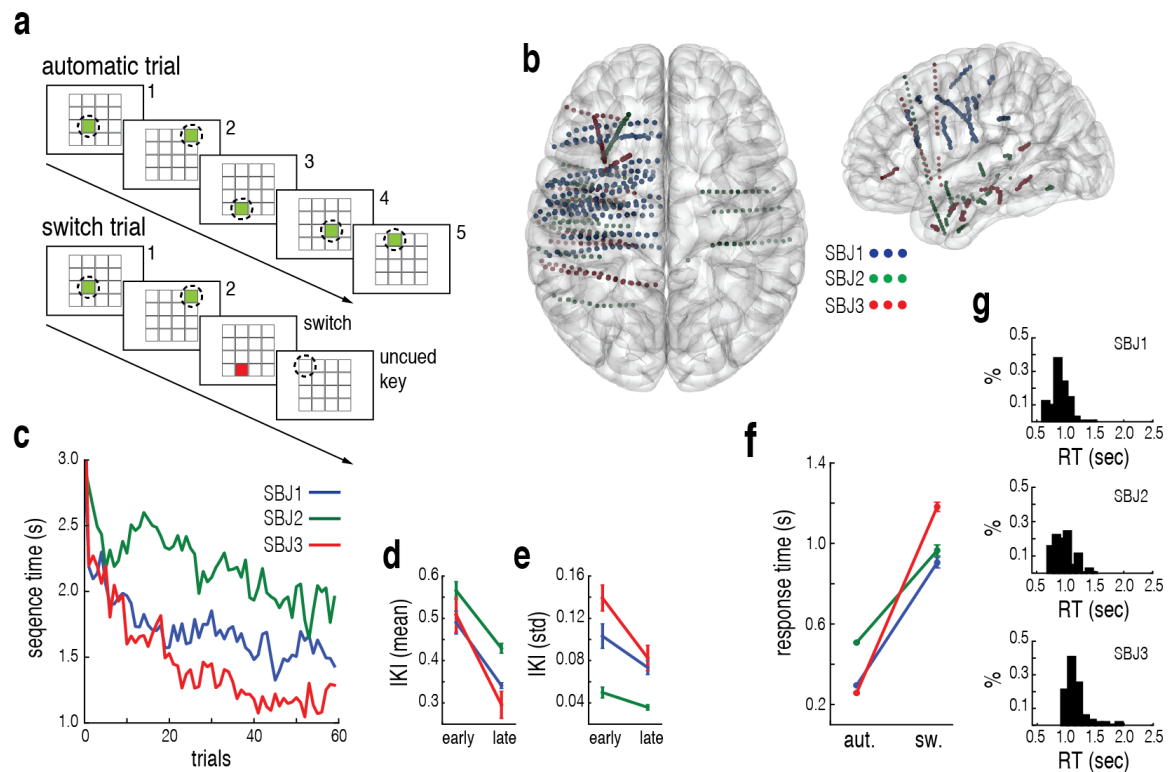

146

147

148

149

150

151

152

153

154

155

156

157

158

159

160

161

162

163

164

165

166

167

**Figure 1. Experimental protocol, recording locations and behavioral performance.** **a.** Serial reaction time task. During automatic trials subjects are required to perform a series of visually guided key presses (green key) following a fixed pseudo-randomly generated sequence. During switch trials subjects are presented with a switch cue (red key in a fixed position) appearing at a random step of the sequence, requiring them to interrupt the ongoing motor sequence and press a specific uncued key. **b.** Projection of the locations of relevant contact points in MNI coordinates for each subject. **c.** Evolution of trail duration during training per subject. **d.** Mean Inter-Key-Interval (IKI) in seconds during early (trial 1-20) and late (trial 40-60) phases of training for each subject. **e.** IKI standard deviation during early (trial 1-20) and late (trial 40-60) phases of training for each subject. **f.** Comparison between response time during automatic and switch trials for each subject. Switch responses are collected from all the valid trials in the switch condition from the appearance of the switch cue to the key press. Automatic responses comprise the same number of key presses sampled from the automatic sequence at random from the pool of automatic trials (SBJ 1: N = 43; SBJ 2: N = 46; SBJ 3: N = 72). **g.** Normalized distribution of response time during switch trials for subject. Response time computes as in f.

### SMAs are involved in switch but not automatic action

It is believed that the SMAs contribute to cognitive control in particular the switching between automatic and deliberate action (2–4). We validated this hypothesis by training a classifier to identify the trial type (automatic vs. switch), by the signals obtained from all the available contact points for each individual subject (see Methods). This classification shows that the signals obtained from the

168 medial-frontal cortex, and in particular the SMAs (BA6C), are most predictive of switch trials (F1  
169 score=0.7) followed by the motor cortex (BA4) (F1 score = 0.57) and the lateral premotor cortex  
170 (B6L) (F1 score = 0.52). In particular, we observe that the amplitude of the iEEG local field potentials  
171 (LFPs) measured in the SMAs is predictive of the type of trial (automatic or switch) (fig. 2-A, B).  
172 Following this step, we restricted our analysis to the relevant contact points in the SMAs in order to  
173 determine the precise role of SMAs in switching from automatic to deliberate behaviors.  
174 Analyzing the time evolution of the SMAs iEEG we observe that during switch trials, a significant  
175 movement related cortical potential (MRCP) preceded the response in all three subjects. In contrast,  
176 this MRCP was not present during automatic trials (T-statistics cluster permutation (N=1000)  
177 analysis: SBJ1,  $t=34.09$ ,  $p<10^{-4}$ ; SBJ2,  $t=21.20$ ,  $p<10^{-4}$ ; SBJ3,  $t=29.69$ ,  $p<10^{-4}$ ) (fig. 2-B). To control  
178 whether this MRCP encoded the motor sequence initiation rather than a switch action per se (27), we  
179 aligned the LFPs for each subject to the cue indicating the beginning of the automatic motor sequence  
180 (not shown). We found no significant increase in amplitude confirming that the earlier observed  
181 MRCP was specific to automatic-deliberate switching (T-statistics cluster permutation (N=1000)  
182 analysis: SBJ1,  $t=7.64$ ,  $p=n.s.$ ; SBJ2,  $t=4.73$ ,  $p=n.s.$ ; SBJ3,  $t=8.13$ ,  $p=n.s.$ ).  
183 Our results confirm that the SMAs mediate the execution of actions that require cognitive control,  
184 such as switch trials and are not involved in the control of over-trained sequential motor responses  
185 nor the initiation of automatic sequences (1).  
186 Due to the high resolution of intracranial EEG, we aimed to identify robust MRCPs at the single trial  
187 level in order to determine what features of the neural signal were predictive of behavioral  
188 performance. To achieve this, we extracted the temporal and amplitude information for each event  
189 by band-pass filtering the signal at low frequencies (1-2 Hz) and further extracting the absolute peak  
190 (fig. 2-C-1,2) (18,28). We further analyzed the time window from the switch cue presentation to the  
191 MRCP peak (TP), the time window from the peak to the key press (FP) and the peak amplitude (A) in  
192 relation to the response time at each trial. Temporal analysis of the MRCP showed a marked  
193 correlation between its time to peak (TP) and reaction time with respect to cue presentation at the  
194 single trial level (Pearson's correlation coefficient: SBJ1,  $R=0.481$ ,  $p<0.001$ ; SBJ2,  $R=0.779$ ,  $p<10^{-10}$ ,  
195 SBJ3,  $R=0.499$ ,  $p<10^{-5}$ ) (fig. 2-E). A similar positive correlation was found between single trial time-  
196 from-peak to key-press (FP) and the response time (Pearson's correlation coefficient: SBJ1,  $R=0.698$ ,  
197  $p<10^{-7}$ ; SBJ2,  $R=0.707$ ,  $p<10^{-8}$ , SBJ3,  $R=0.464$ ,  $p<10^{-5}$ ) (fig. 2-F). In contrast, peak amplitude showed  
198 no consistent effect on response times and only in one subject reached statistical significance  
199 (Pearson's correlation coefficient: SBJ1,  $R=0.141$ ,  $p=0.371$ ; SBJ2,  $R=0.314$ ,  $p=0.035$ , SBJ3,  $R=0.06$ ,  
200  $p=0.959$ ) (fig. 2-G). To further quantify the relevance of the time to peak and amplitude aspects of the  
201 MRPC for switch behavior we fit a linear model for each variable and computed the explained  
202 variance ( $R^2$ ) with respect to  
203



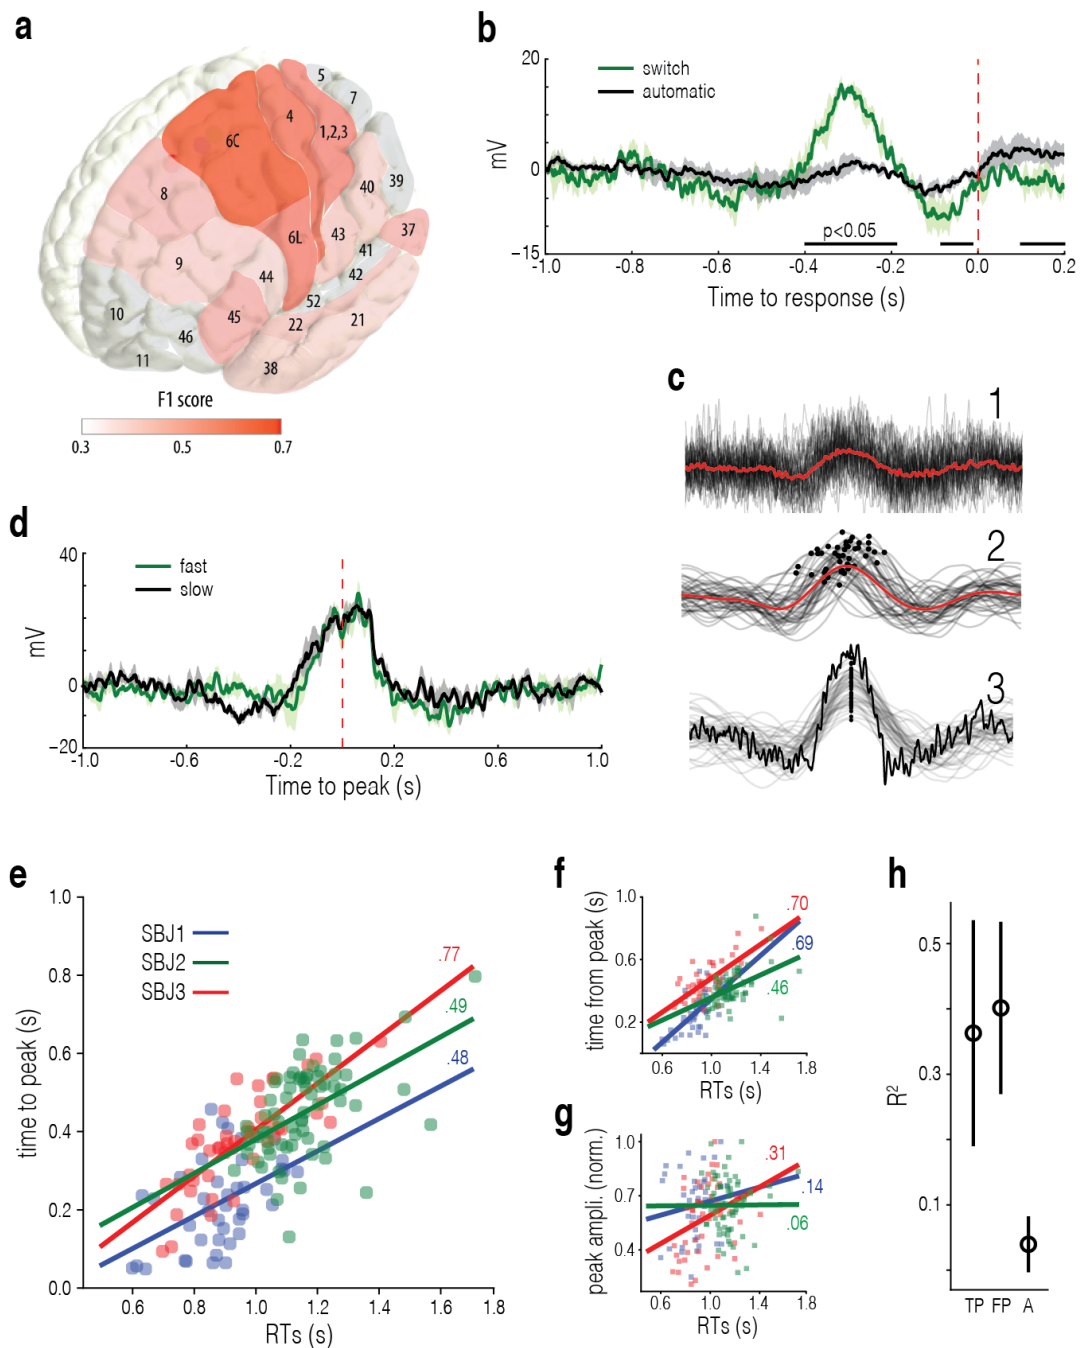

204

205

206

207

208

209

210

211

**Figure 2. Neural response in SMAs.** **a.** Classifier mean prediction accuracy of switch trials projected over a Brodmann atlas. Red hue represents the classification accuracy (F1 score) associated with the areas that were recorded, gray denotes areas not present in the recording. **b.** Motor Related Cortical Potential (MRCP) in SMAs during switch (green) and automatic (black) trials aligned to motor response (red dashed). Switch trials are aligned to the key-press in response to the switch cue (key press of the uncued key), automatic trials are aligned to the last key-press of the automatic sequence. Mean and SEM for each subject. Bar indicates the intersection of

212 significant temporal windows for all the subjects ( $p < 0.05$ ). **c.** Example of alignment of single trial MRCPs to the  
213 relative peak for one subject. 1. Key-press aligned MRCPs for each switch trial (black) and mean (red). 2. 2Hz  
214 Low passed MRCPs for each trial (black) and mean (red). Black dots indicate the detected peaks. 3. Alignment of  
215 low passed filtered MRCPs by their relative peak and unfiltered average. **d.** MRCP in SMAs during fast and slow  
216 responses during switch trials (trials sorted by the median of the response time distribution) aligned to the peak  
217 of the band-passed MRCP (red dashed). Mean and SEM of subjects. **e.** Relationship between time of response and  
218 of cue presentation to MRCP peak during switch trials for each subject. Solid line indicates the linear fit of the  
219 data and Pearson's correlation coefficient. **f.** Relationship between response time and time from MRCP peak to  
220 key-press during switch trials for each subject. **g.** Relationship between response time and MRCP peak  
221 amplitude during switch trials for each subject. **h.** Mean  $R^2$  linear regression coefficient between response time  
222 and time from cue to peak (TP), time from peak to key-press (FP) and peak amplitude (A). Each score is obtained  
223 on the test set as a result of an independent regression for each regressor trained on 70% of the available  
224 aggregated trials and tested on the remaining 30%. Mean scores and standard deviation are the result of a 100-  
225 fold cross-validation.

226  
227 the response time (fig. 2-H). This analysis confirmed that the temporal dynamics of the MRPC in  
228 terms of time-to-peak from cue onset and time-from-peak to response could accurately predict  
229 performance while excluding amplitude as a reliable predictor of motor behavior.

230 We subsequently analyzed whether the profile of the MRPCs showed any behavior dependent  
231 modulation by comparing fast and slow switch trials (fig. 2-D). For each subject, trials were aligned to  
232 the time of the peak of the band-passed MRCP (as shown in fig. 2-C-3). Further, these trials were  
233 sorted into two groups according to the median value of the response time distribution (i.e. fast and  
234 slow) in order to obtain an equal number of trials for each group and potential differences between  
235 groups tested using cluster-based permutation analysis. This analysis revealed no differences  
236 between fast and slow switch trials (T-statistics cluster permutation (N=1000) analysis: SBJ1,  $t=5.87$ ,  
237  $p > 0.05$ ; SBJ2,  $t=9.23$ ,  $p > 0.05$ ; SBJ3,  $t=8.61$ ,  $p > 0.05$ ) suggesting that, although the MRPC is a  
238 characteristic neural signature of switch actions, it does not encode information predictive of  
239 behavioral parameters such as response time.

240 Altogether, these results suggest that the SMAs are recruited for deliberate control of switching  
241 behavior and that the temporal features of the MRPC, i.e. phase, are decisive in controlling the  
242 response time (29).

243

244

### 245 **Theta phase aligns in faster actions**

246

247 We hypothesized that oscillatory dynamics in the theta range could constitute a neural signature of  
248 cognitive control by mediating deliberate action switching. Previous reports have suggested a strong

249



250

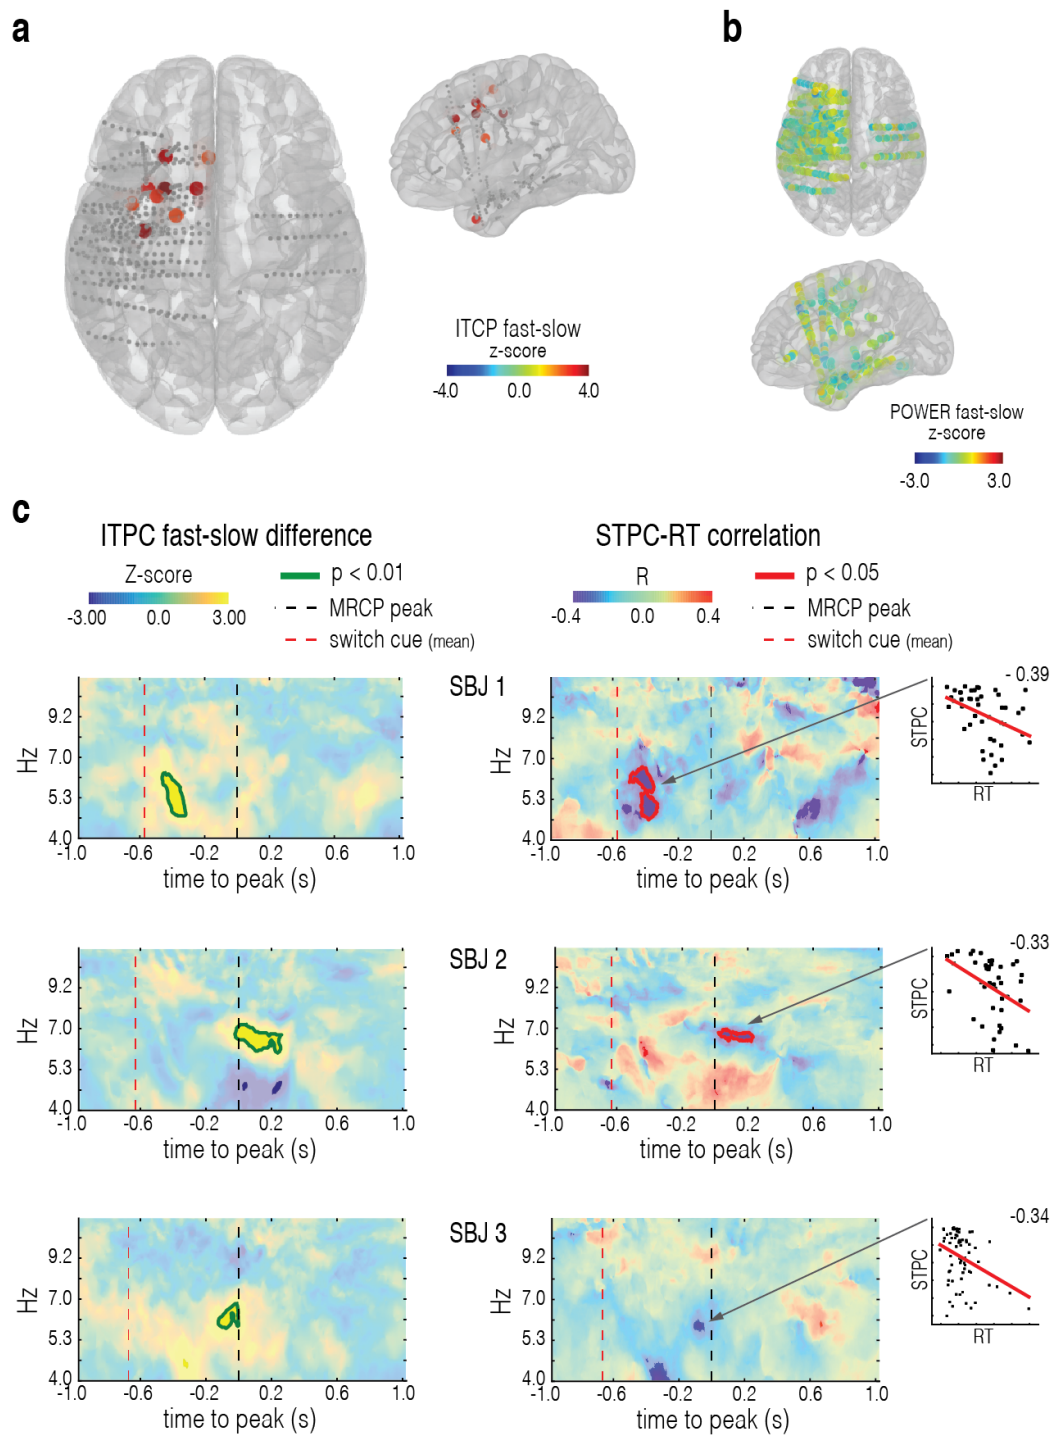

251

252

253 **Figure 3. Phase alignment and performance. a.** Inter-trial phase coherence difference (z-score) between fast and slow (fast-slow) switch trials for the combination of the significant contact points for each subject projected

254 on the MNI space. Contact points showing a significant cluster of time-frequency bins ( $z > 2.58$ , Montecarlo p

255 value < 0.05) in the time window -1 s to 1 s centered to the peak of the MRCP are represented in color. **b.** Power

256

257 difference (z-score) between fast and slow (fast-slow) switch trials for the combination of all the contact points  
258 available from all the subjects projected on the MNI space. No contact point reached a statistically significant  
259 level, therefore no masking is applied to this figure. **c.** Single subject statistical analysis. **left.** ITPC normalized  
260 difference between fast and slow (fast-slow) switch trials. Trials are aligned by the relative peak of the MRCP  
261 (black dashed line). Red dashed line indicates the average cue onset time with respect to MRCP peak. Green  
262 outline indicates region with Monte Carlo P value < 0.01. **right.** Spearman's R correlation coefficient between  
263 Single Trial Phase Coherence (STPC) and Response Time (RT) computed for each time frequency bin during  
264 switch trials. Trials are aligned by the relative peak of the MRCP (black dashed line). Red dashed line indicates  
265 the average cue onset time with respect to the MRCP peak. Red profile indicates Monte Carlo P value < 0.05. **box.**  
266 Relationship between Response Time and STPC for the significant area shown in the time-frequency plot shown  
267 to the left. Red line indicates linear fit.

268  
269 implication of phase dynamics in cognitive control (11,12,16) suggesting the possibility that  
270 stereotypical phase profiles could underlie deliberate action modulation.

271 To detect potential stereotypical phase patterns underlying the differences in response times (RT),  
272 we first aligned the LFPs to the peak of the MRCP. Note that this is not only a necessary step to filter  
273 out inter- and intra- subject differences so as to compare phase profiles across conditions (19), but it  
274 could also reveal oscillatory patterns that are removed when using exogenous events as reference  
275 (8,12,20). Further, we sorted the switch trials for each subject into two classes of equal size (*fast* and  
276 *slow*), by splitting the RT distributions by their median value. For each subject and each available  
277 contact point, we then calculated ITPC for fast and slow trials and computed the normalized phase  
278 coherence difference following the method described in (30) (see Methods).

279 Class comparison revealed a significantly larger phase alignment in fast trials compared to slow trials  
280 localized in the SMAs for all the subjects. To verify the specificity of this result we applied Z-statistics  
281 cluster permutation analysis to all the available contact points in order to identify significant  
282 differences in ITPC between fast and slow trials (see Methods) and further projected in MNI space  
283 the contact points with a significant difference ( $p < 0.05$ ) in the time window between -0.6 and 0.4 s  
284 with respect to the peak of the MRCP (Figure 3-A, see Methods). We observe that, contact points with  
285 significantly stronger phase alignment fall in between Brodmann area 6 and 9 for subjects 1 and in  
286 Brodmann area 6 for subjects 2 and 3. This effect was found in the theta frequency range between 4  
287 and 8 Hz (fig. 3-C left for an example for each subject) with an onset varying across subjects between  
288 0.5 and 0.1 seconds before the MRCP peak, possibly due to implant location differences (i.e. more  
289 frontal for subject 1). Similar theta range variability was detected in the contact points of individual  
290 subjects in areas anatomically or functionally related to the SMA. In particular, in the anterior  
291 cingulate cortex (ACC) of subject 3 and in the temporal lobe of subject 2 (see Table 1 for a list of the  
292 contact points with significant differences ( $p < 0.05$ ) in phase alignment between fast and slow  
293 trials).

294 To further confirm the role of theta phase dynamics with respect to action switching, we applied a  
295 single-trial analysis to a subset of contact points in the SMAs that showed the reaction speed and  
296 phase alignment effect. Our specific goal was to determine the contribution of inter-trial phase  
297 coherence to motor performance. In particular, we computed the total inter-trial phase coherence  
298 (ITPC) for each time-frequency bin and inferred the individual contribution of intra-trial coherence  
299 by computing a Single Trial Phase Coherence (STPC) pseudo value following (22,23). Finally, for each  
300 time-frequency bin, we computed a Spearman's R correlation between the trial response times (RT)  
301 and the relative STPCs (see Methods). We observe a negative correlation between RT and STPC in the  
302 4-8 Hz frequency band once aligned to the peak of the MRCP (fig. 3C, right) (Z-statistics cluster  
303 permutation (N=1000) analysis: SBJ1,  $z > 1.96$ ,  $p < 0.001$ ; SBJ2,  $z > 1.96$ ,  $p < 0.001$ ; SBJ3,  $z > 1.96$ ,  $p = 0.07$ ).  
304 Altogether these analyses reveal a stereotypic phase profile of theta oscillations locked to the motor  
305 potential controlling action switching whose magnitude is monotonically related to the time of the  
306 behavioral response at the single trial level.  
307 Importantly, it has been argued that phase coherence may be induced by increases in the power of  
308 the oscillations, thus constituting an evoked rather than an actual phase alignment (29). We  
309 controlled for this possibility by calculating the difference in power between fast and slow trials and  
310 compared the obtained z-scored differences with those obtained in the ITCP domain (fig. 3-B). This  
311 analysis confirms a significant effect of ITPC on response time in the absence of significant  
312 differences in power suggesting that the detected phase alignment is likely the result of an actual  
313 phase coding mechanism within the theta range.  
314 Altogether, these results suggest that the SMAs play a central role in controlling the ability to switch  
315 from the execution of an automatic motor sequence to the execution of a deliberate action prompted  
316 by an unexpected cue. The enhanced synchronization of theta frequencies in faster switch trials, in  
317 absence of power differences, supports the role of phase dynamics as a mediating mechanism that  
318 facilitates the execution of deliberate movements. In addition, the differences found in the ACC and  
319 temporal lobe support the existence of a functional network involved in switching. Within this  
320 network the ACC could be responsible for selectively biasing processes in favor of task relevant  
321 information during high conflict switch trials (31). The temporal lobe in turn might encode for  
322 arousal or surprise elicited by the unexpected cue (32,33) or support the mnemonic aspects of the  
323 decision making process (e.g. retrieving what key should be pressed once the cue is presented) (34).  
324

| Subject | Contact point | MNI coordinates          | Brodmann Area | ITPC statistics     |
|---------|---------------|--------------------------|---------------|---------------------|
| 1       | I'12          | -23,713;25,731;35,165    | BA9           | Z=3.547, MC_p=0.004 |
| 2       | T'3           | -32,098; 10,264; -38,737 | BA36          | Z=3.210, MC_p=0.022 |
| 2       | X'10          | -24,089; 10,467; 38,760  | BA6           | Z=4.003, MC_p=0.014 |

|   |      |                         |      |                     |
|---|------|-------------------------|------|---------------------|
| 3 | K'2  | -8,865; 10,540; 47,061  | BA32 | Z=3.546, MC_p=0.016 |
| 3 | O'10 | -39,712; 3,550; 30,963  | BA48 | Z=2.841, MC_p=0.026 |
| 3 | M'9  | -33,840; -9,556; 39,289 | BA6  | Z=3.737, MC_p=0.022 |
| 3 | R'4  | -18,703; -2,314; 56,739 | BA6  | Z=2.836, MC_p=0.04  |
| 3 | K'7  | -27,784; 6,911; 42,980  | BA6  | Z=3.005, MC_p=0.046 |
| 3 | B'1  | -3,148; 25,277; 26,200  | BA32 | Z=2.727, MC_p=0.042 |

325

326

**Table 1.** List of all the contact points where the difference in ITCP between fast and slow trials reached statistical significance.

327

328

329

### 330 **Cross-frequency coupling predicts faster movements**

331

332 We have shown that the speed of deliberate action switching is accompanied by theta phase  
333 alignment. However, the direct physiological link needed to support the hypothesis that theta phase  
334 dynamics modulate performance via phase-dependent neural activity needs to be established. We  
335 sought to answer this question by determining the modulatory effect of theta phase on local high-  
336 frequency activity with the hypothesis that higher modulation could support faster switch actions  
337 (fig. 4-A), an analysis for which a measure of cross-frequency Phase-Amplitude Coupling (PAC) is  
338 particularly suited (35,36).

339 We restricted our analysis to the contact points and the temporal windows of approximately 400 ms  
340 where a significant increase in phase alignment was detected (Figure 3C). To achieve the temporal  
341 resolution necessary for this type of analysis we obtained one surrogate signal for fast and slow trials  
342 for each subject by concatenating the respective single trial windows for all the SMAs contact points  
343 for each subject (see Table 1 for a list of contact points). Further, we computed PAC values (using the  
344 GLM approach (37)) between 4-8 Hz phase (modulatory frequency) and the amplitude of higher  
345 frequencies (10-100 Hz in steps of 2 Hz, modulated frequency), and obtained the difference between  
346 the two types of trials. Further, to test the significance of the difference between fast and slow trials,  
347 we computed the expected difference in PAC under the null hypothesis by shuffling the two types of  
348 trials and extracted the z threshold corresponding to  $p=0.01$  (38) (see Methods). We observed an  
349 increased modulatory effect of the theta oscillatory phase on the amplitude of frequency bands in the  
350 low gamma range (30-80 Hz), which was consistent across subjects (Z-statistics permutation  
351 (N=1000) analysis: SBJ1,  $z>2.58$ ,  $p=0.027$ ; SBJ2,  $z>2.58$ ,  $p=0.034$ ; SBJ3,  $z>2.58$ ,  $p=0.029$ , fig. 4-B,D). In  
352 addition, a significant modulatory effect was found in the beta range (i.e. 30 Hz) for one subject (SBJ1,  
353  $z>2.58$ ,  $p=0.019$ ). Further analysis revealed no difference in absolute gamma amplitude between trial

354 types (SBJ1,  $p=0.23$ ; SBJ2,  $p=0.26$ ; SBJ3,  $p=0.65$ ), suggesting that the magnitude of phase modulation,  
 355 rather than activity *per-se*, has a direct effect on controlling performance (fig. 4-D). This result  
 356 supports a neurophysiological link between theta phase coherence and deliberate control of the  
 357 action switching through the modulation of high-frequency activity, often interpreted as a correlate  
 358 of local population activity (35).

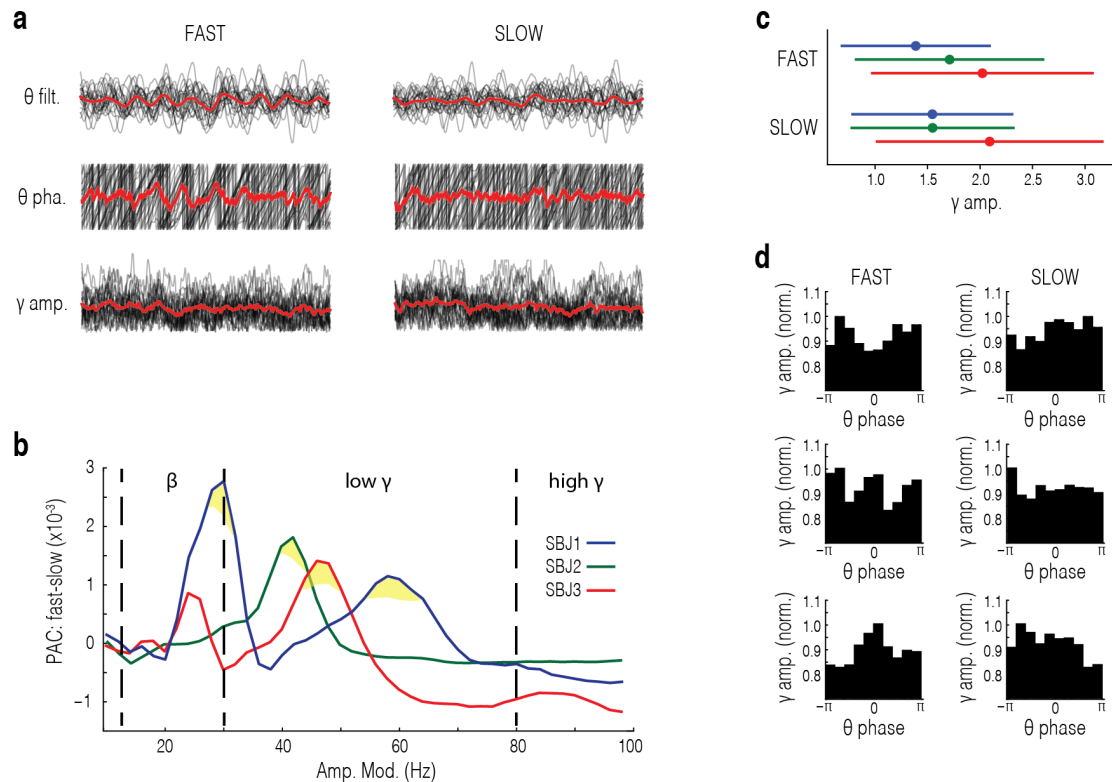

359  
 360  
 361 **Figure 4. Theta-gamma cross frequency coupling and its relation to performance.** **a.** Example of  
 362 oscillatory activity in SMAs during fast trials (left) and slow trials (right) for SBJ 2. Top. LFP traces of individual  
 363 switch trials (black) and mean (red) filtered in the theta range (4-8 Hz). Center. Oscillatory phase of the  
 364 individual LFP traces (black) and mean (red) shown in the above panel. Bottom. Amplitude of the individual LFP  
 365 traces (black) and mean (red) filtered in the low gamma range (30-80 Hz). All traces are aligned to the peak of  
 366 the MRCP and sorted by fast (< 900 msec) and slow (> 900 msec) response time. **b.** Difference in phase  
 367 amplitude coupling (PAC) between fast and slow trials (fast-slow) for each subject comparing the phase of theta  
 368 oscillations (4-8 Hz) to the amplitude of higher frequency bands ( $\times$ , 30 Hz, 30-80Hz, and 80-100 Hz). Yellow area  
 369 indicates  $p < 0.05$ . **c.** Quantification of mean gamma amplitude in fast and slow trials for each subject selected  
 370 from statistically significant regions marked in yellow in panel b. Bar indicates standard error of the mean. **d.**  
 371 Distribution of gamma band amplitude (selected from statistically significant regions in b) over the phase of  
 372 theta for fast (left) and slow (right) trials for each subject.

373

374

375 **DISCUSSION**

376

377 Switching from automatic to deliberate behavior in response to environmental cues is a key aspect of  
378 adaptive behavior, however, the substrate and dynamics supporting this ability in the human brain  
379 are not fully understood. Here, we have addressed this question by analyzing the iEEG of the  
380 neocortex subjects engaged in a switch task. We designed a variation of the Serial Reaction Time  
381 Task (SRTT) where automaticity is detected as a progressive shift towards faster and more  
382 stereotyped movements, indicating that sequences are performed on the basis of an internal habitual  
383 representation and allowed to execute autonomously (7,39,40). Using a classifier of the time-domain  
384 features of the iEEG we localized a predictive signal of switch trials to the SMAs which confirmed its  
385 role in action control. We found that by aligning trials to action initiation, stereotypical phase profiles  
386 in the theta range emerged in the SMAs that predicted switch performance at the single trial level. In  
387 addition, we showed that theta rhythms modulated high-frequency power in a performance-  
388 dependent manner.

389 In our design, however, we extended the SRTT by introducing a switch cue the required the subjects  
390 to interrupt the automated sequence and execute an alternative key-press. This alternative action  
391 was un-cued, and it occurred at a low and variable rate, at unexpected positions in the sequence, in  
392 order to both avoid habituation and maintain active deliberation. This manipulation is analogous to  
393 the switch cue used in (6). However, in our setup, the alternative action was un-cued, to guarantee a  
394 minimum amount of deliberation since subjects had to retrieve and implement a specific instruction  
395 set from memory (5). During the switch trials, we found significantly longer response times,  
396 suggesting a switch from automatic to controlled, deliberate processes (3,6,41). Within the  
397 psychological literature, this behavioral marker is known as switch cost (42), interpreted as the  
398 result of an “act of control” that involves attentional, mnemonic and motor processes.

399 We found that activity in the SMAs could successfully predict whether the action was performed  
400 deliberately or automatically, supporting the involvement of human SMAs in executive control. This  
401 result extends previous evidence from primate studies that demonstrated a lateralized increase in  
402 the firing rate of supplementary eye field neurons that exclusively accounted for successful  
403 performance during switch but not automatic actions (4). Although the activity profile found in our  
404 study is qualitatively similar to the one reported in (6), it remains unclear what the  
405 neurophysiological link between low-frequency LFP events and firing rate is. One possibility is that  
406 the motor potential we reported (fig. 2-b) is the result of the sum of synchronized  
407 afterhyperpolarization events of SMAs neurons contributing to the extracellular field potential (43).  
408 This pattern of activity is also consistent with human fMRI studies that reported a consistent  
409 activation of the SMAs and the more anterior pre-SMAs during action switching (1,41,44). For  
410 example, SMAs are transiently active, together with the cingulate cortex, during the execution of  
411 switch actions triggered by response conflict (1,45). Besides, TMS induced inhibition of medial  
412 frontal areas impaired the ability to switch between motor responses but not the ability to initiate



413 action per se, an observation consistent with our results showing no significant change of activity  
414 during sequence initiation (46). Moreover, contrary to previous reports (27), we excluded the  
415 possibility that the neural signature of switching we report could encode sequence production, as no  
416 SMAs activity was found during automatic trials. Instead, we demonstrate, to the best of our  
417 knowledge, for the first time the movement-cortical potential (MRCP) as the prominent signature of  
418 deliberate action switching in the human SMAs using iEEG. MRCPs are low-frequency potentials  
419 generated in association with the planning and execution of a cued or self-paced voluntary  
420 movement in premotor and motor regions (18). MRCPs can be decomposed in three distinct  
421 components: a slow rise component, known as Readiness Potential, which is more prominent in self-  
422 paced movements (47,48). A fast decay component following the RP, called negative slope (NS),  
423 which peaks at the moment of maximum negativity in concomitance of action initiation (motor  
424 potential - MP). Finally, a rebound activity following movement initiation is associated with  
425 movement monitoring. In our task, we identified a strong NS component preceding movement  
426 initiation but no clear RP, possibly because the switch action was not internally (i.e. voluntarily)  
427 generated. Previous literature indeed shows more prominent NS and absence of RP in cue-guided  
428 movements compared to self-paced ones (49).

429 The absence of RP could also support a recent hypothesis by Schurger and colleagues (50). They  
430 suggest that this apparent signature of volitional control could be attributed to an artefact arising  
431 from the averaging of stochastic fluctuations in the neural activity over trials. Indeed, within the EEG  
432 literature MRCPs are typically extracted from averaging across a large number of trials time-locked  
433 to action initiation, in order to filter out the noise and account for artefacts introduced by scalp  
434 diffusion (51). This procedure, however, generates an artificial build-up in the averaged signal that  
435 reflects the integration of noise in a stochastic decision process (SDP) following a drift-diffusion  
436 model, where neural activity reaches a “decision threshold” and drives action initiation due to the  
437 combination of evidence and stochastic fluctuations. The latter is seen as the source of the variability  
438 in response times (52). In our study, the higher resolution and low SNR of iEEG allowed to robustly  
439 detect MRCPs at the single trial level directly from the neural tissue and to extract reliable MRCPs  
440 features. This allowed for a single-trial analysis precluded in standard EEG analyses usually deployed  
441 in the investigation of RP (8,20,21) that support the SDP hypothesis. From a time-domain  
442 perspective, the key finding in the single trial analysis of switch trials is that the temporal aspects of  
443 the MRCP peak, but not its amplitude, could accurately predict switch response times. This is at odds  
444 with previous EEG reports that showed a significant difference in the amplitude of cortical potentials  
445 depending on the speed and strength of the movement (53,54). The difference between our and  
446 previous results could be due to the different methods employed in the recording. LFPs indeed  
447 represent the extracellular activity of neural populations, and they closely track responses in a  
448 restricted area of the neural tissue. EEG, in turn, captures a more spatiotemporally extended yet

449 attenuated LFP that integrates several square millimeters of superficial cortical activity and it may  
450 reflect more diffuse macroscopic effects (43).

451 Another methodological advantage of detecting single-trial time domain features is the possibility to  
452 align individual trials to the dynamics of endogenous events. This is a necessary step to compare  
453 oscillatory patterns across different conditions and subjects, as it has been shown that phase  
454 synchrony measures are sensitive to inter-subject and intra-subject temporal variability (19). In  
455 addition, previous studies have shown that locking to endogenous events rather than to exogenous  
456 ones (i.e. stimulus presentation) can reveal important and otherwise hidden dynamics (12). By  
457 aligning individual trials to the MRCP peak, we found that phase synchrony in the theta band across  
458 trials predicted switching actions, where higher synchrony is associated with faster trials. This result  
459 suggests that action initiation is locked to stereotypical phase profiles in the theta range, suggesting a  
460 mechanism by which neurons in the medial frontal cortex synchronize to convey cognitive control  
461 signals to downstream motor areas. This also defines a contrast between our results and the SDP  
462 hypothesis, by virtue of analyzing signals relative to an internal reference, i.e. MRCP, we reveal a  
463 systematic phase code orchestrating action control that will appear stochastic when referenced to  
464 external or overt events such as stimuli or responses.

465 Importantly, we have shown that high synchronicity is prominently and consistently observed in the  
466 SMAs but significant differences were also observed in the anterior cingulate cortex and the temporal  
467 lobe of individual subjects (fig. 2a). This result suggests that the SMAs do not operate in isolation  
468 during action switching, but form part of a broader functional network that involves sensory and  
469 mnemonic processes. Indeed it has been suggested that the dorsal part of the ACC could play a major  
470 role in conflict resolution by facilitating the selection of task relevant information during high conflict  
471 decisions (31,55). The consistency between the activity in the ACC and SMAs we observe (fig. 3-a)  
472 supports this hypothesis and the existence of a functional connection between the two areas (55,56).  
473 In addition, it has been recently shown that the medial frontal cortex can flexibly recruit the medial  
474 temporal lobe during decision-making by means of phase synchrony in the theta band (34). This  
475 dynamic functional link between mnemonic and motor processes could explain the higher ITPC in  
476 the temporal lobe found in our data (fig. 3-A) and suggests the involvement of this area in supporting  
477 the mnemonic aspects related to the task (e.g. to recall what action should be performed when an  
478 unexpected cue is presented).

479 More generally, phase coding has been acknowledged in the human hippocampus and temporal lobe  
480 in mnemonic processes. In particular, (57) found that oscillations in the theta band reset their cycle  
481 after stimulus presentation, leading to strong patterns of inter-trial phase coherence that correlate  
482 with memory encoding. Similar phase resets in the theta range are found in frontal circuits with  
483 greater synchrony underlying correct trials (58) and are thought to mediate attentional shifts. The  
484 temporal patterns found in our study could, therefore, be the result of a switch cue induced phase  
485 reset, encoding action related information, where the magnitude of the reset and its entrainment of

486 local activity drives faster motor responses. The cycle of theta oscillations could indeed carry  
487 patterns of information by modulating the amplitude of higher-frequencies in the gamma range (24).  
488 Theta-gamma code is believed to represent a fundamental information-processing mode of the brain  
489 responsible for sequential item encoding long-term and working memory within memory areas (59).  
490 Recently, signatures of the theta-gamma code have been found in frontal cortical circuits during  
491 cognitive control tasks. (12) for example, found increased theta-gamma phase-amplitude coupling  
492 between prefrontal and motor regions when decisions followed higher order rules. Few reports have  
493 linked phase coding to single trial behavioral performance, as in (15) where the strength of phase-  
494 amplitude coupling in frontal and parietal regions correlated with reaction times during the  
495 allocation of visuospatial attention. Similarly, we report distinct theta-gamma coupling modulated by  
496 behavioral performance which suggests that theta range activity reflects a cognitive control signal  
497 that entrains the gamma frequency activity of local neuronal populations (35).  
498 Altogether these results contribute to a growing body of literature that identifies frontal theta phase  
499 coding as a mechanism promoting cognitive control of behavior (11). Low-frequency oscillations  
500 indeed could be a means of information exchange across distant populations within the same  
501 functional network (13,35). For example, (16) found fronto-parietal theta synchrony in primate in  
502 primate to be predictive of the ability to correctly switch from automatic to deliberate control.  
503 However, differently from our analysis, they did not find a relationship with the response time. A  
504 similar synchronization pattern was found between the medial frontal cortex and the basal ganglia  
505 (60).  
506 Low-frequency oscillatory patterns could also be the result of cortical travelling waves in the theta  
507 and alpha bands that have been identified as a mechanism through which information propagates  
508 throughout cortical networks (61). Importantly, the spatial and temporal consistency of travelling  
509 waves in the prefrontal cortex has been shown to have a facilitatory effect on working memory  
510 retrieval, with greater synchrony predicting faster responses (21). Our results suggest a similar effect  
511 within supplementary-motor circuits with phase synchrony having a facilitatory effect on deliberate  
512 behavior. Contrary to this hypothesis, it has been suggested that medial-frontal theta oscillations may  
513 also reflect inhibitory control by mediating action-slowness during situations of conflict and error (9).  
514 In particular, human EEG studies testing interference tasks reported increased power in the theta  
515 range during high-conflict trials correlating with an increase in response time, both prospectively  
516 and retrospectively (i.e. post-error slowing) (8–10). Even though we did not explicitly test for this  
517 aspect within our paradigm, we cannot confirm the role of theta as a signature of inhibition for three  
518 reasons. Firstly, our analysis did not reveal any distinctive role of theta oscillatory power. In addition,  
519 theta oscillatory phase alignment was found to reduce rather than increasing the response time on  
520 deliberate switch trials. Finally, in our experiment, the detected pattern of synchronized activity  
521 emerged by aligning the LFP of each trial to the peak of an action related event. If theta  
522 synchronization represented an inhibitory signal, this event would not be strictly dependent on

523 action execution and it would be expected to rise consistently earlier than the peak of the MRCP (62).  
524 This discrepancy might again be due to the differences in resolution and specificity of iEEG versus  
525 EEG recordings.

526 Overall, our results suggest that within frontal cortical networks, theta oscillations encode a control  
527 signal that promotes the execution of deliberate actions. In particular, we propose that the power  
528 and phase of theta oscillations may reflect different functional roles, where the former locally  
529 encodes a general conflict signal and the latter serves as a long-range communication channel  
530 facilitating cognitive control (63). This proposal is in agreement with recent accounts of cognitive  
531 control that essentially see action selection (i.e. facilitation) and inhibition as two faces of the same  
532 coin and therefore postulate complementary neural mechanism underlying these functions (64,65)  
533 such as the power and phase of theta band oscillations. This further confirms that phase coding is a  
534 fundamental representational format deployed by the brain.

535

536

## 537 **METHODS**

538

### 539 **Data collection**

540

541 Data were collected from three right-handed subjects with intractable epilepsy, temporarily  
542 implanted with intracranial electrodes (iEEG) as a part of a pre-operation procedure to localize the  
543 seizure focus. Electrode placement was determined by the surgeons based on the clinical need of  
544 each patient.

545 Data were recorded at the Epilepsy Monitoring Unit of the Hospital del Mar, Barcelona, Spain. All  
546 subjects provided the informed consent to participate in the study in accordance with the ethical  
547 committee of the Pompeu Fabra University as well as Hospital del Mar. All iEEG recordings were  
548 performed using a standard clinical EEG system (XLTEK, subsidiary of Natus Medical) with a 500 Hz  
549 sampling rate. A uni- or bilateral implantation was performed using 12 to 16 intracerebral electrodes  
550 (Dixi Médical, Besançon, France; diameter: 0.8 mm; 5 to 15 contacts, 2 mm long, 1.5 mm apart) that  
551 were stereotactically inserted using robotic guidance (ROSA, Medtech Surgical, Inc).

552

553 To identify the anatomical position of the electrode contacts we used the 3D Slicer software(66).  
554 With the registration tool, we coregistered (rigid body, 6 degrees of freedom) the post-implantation  
555 CT scan to the pre-implantation MRI. We then added the electrode fiducials on a glass model of each  
556 patient's brain obtained with the segmentation tool of the Freesurfer bundle (67). To obtain a single  
557 model we coregistered all studies on the MNI152 template provided by the Freesurfer bundle using a  
558 semi-automated registration process of 3D Slicer. Briefly, we calculated a linear transform with 12  
559 degrees of freedom by superposing and morphing each patient's brain MRI onto the MNI brain

560 template, then we used the transform matrix to translate, shift, skew and resize all other studies (CT  
561 scan, and unaltered MRI) accordingly. Since the 3D Slicer interface shows the MNI coordinates when  
562 hovering the mouse pointer, we could identify structures touched by electrode contacts both by  
563 visual inspection and by referring to the aforementioned coordinates.

564

565

### 566 **Behavioral task**

567

568 The behavioral task was a variation of the standard Serial Reaction Time Task (SRTT), a type of  
569 paradigm that promotes automation of sequential motor behavior (17). Differently from the original  
570 task, however, here, in a small subset of trials, the sequential automated action was occasionally  
571 interrupted by a cue that required the subjects to switch to a different goal instructed at the  
572 beginning of the experiment.

573 The task comprised a maximum of 500 experimental trials preceded by 60 trials of training. There  
574 were two types of trials: automatic and switch. Every trial started with a waiting period of 700 ms +-  
575 200 ms during which the screen remained blank. After this, subjects were presented with a virtual 4  
576 by 4 square keyboard.

577 During automatic trials, a sequence of five keys was highlighted sequentially (green cue) upon  
578 button-press. Subjects were instructed to press the cued key as rapidly as possible until the end of  
579 the sequence. Each trial terminated at the end of the sequence, and the following one started. The  
580 sequence was pseudorandomly generated at the beginning of the experiment to respect a spatial  
581 uniform distribution over the keyboard and it was maintained constant throughout the experiment.  
582 Switch trials started with the same highlighted key as the automatic trials (green cue), and the next  
583 step in the sequence was highlighted upon a button press. Differently from automatic trials, however,  
584 one of the intermediate steps of the sequence (i.e. step 2-4 selected at random) highlighted in red  
585 (switch cue). Upon presentation of the switch cue, subjects were required to halt the ongoing  
586 sequence of movements as fast as possible and press an alternative, uncued key. Participants  
587 received all the instructions prior to the beginning of the experiment. Feedback was provided for  
588 neither the correct nor incorrect performance. The training phase only comprised automatic trials,  
589 whereas the experimental phase included a combination of automatic and switch trials pseudo-  
590 randomly interspersed every 7 +-2 trials.

591 The experimental setup ran on a portable capacitive screen fixed to the hospital overbed table. The  
592 tablet included a custom-made Java-based application running the experimental task and logged  
593 behavioral performance at 50 Hz whereas task synchronization with the neural recordings was  
594 achieved through serial communication with the recording system. Subjects sat in a comfortable  
595 position that avoided motor constraints to the arm. After receiving the instructions, subjects

596 underwent a short session that exemplified the task. After this, the experimental session started.  
597 Subjects could withdraw at any point during the task.

598

599

### 600 **Electrophysiology pre-processing**

601

602 All electrophysiological data were preprocessed in Matlab (EEGLAB toolbox) and subsequently  
603 analyzed in Python using custom scripts based on the Numpy , Scipy , SkLearn and MNE libraries.

604 Data were initially filtered using a two-way zero phase-lag, FIR bandpass filter (2-200 HZ) and an  
605 additional notch filter (window = 2Hz) at 50Hz, 100Hz and 150Hz to remove AC current  
606 contamination and respective harmonics. Following this step, the signals were individually re-  
607 referenced to the average potential of all electrodes for each subject.

608 After filtering, artifacts derived from strong muscle activity or interference due to contact with  
609 electrical devices were identified by visual inspection and respective epochs rejected. To reduce  
610 remaining artifacts (i.e. cardiac artifacts, muscle twitches), we applied a combination of Principal  
611 Component Analysis (PCA) and independent component analysis (ICA). In brief, we performed PCA  
612 on all channels and identified those components which accounted for > 98% of the variance. Such  
613 components were subsequently decomposed into the same number of independent components  
614 through ICA. At this point, each component time series was visually inspected and components that  
615 reflected signal artifacts were rejected. The selection of artifact components was based on a careful  
616 inspection of their power spectrum, correlation with other physiological measures (i.e. ECG), and the  
617 relation to the temporal structure of the experiment. The rejection was performed by setting the ICA  
618 weight associated to the artifact component to 0. The signal was further reconstructed by inverting  
619 the ICA operation and the subsequent PCA operation after having renormalized the remaining  
620 weights.

621

622

### 623 **Amplitude analysis**

624

625 For each subject, the filtered and artifact-free signal was split into epochs according to the trial  
626 structure of the task. Each epoch was individually baseline corrected by subtracting the mean  
627 amplitude value in a temporal window of 500 ms preceding the beginning of each trial. To identify  
628 task-selective channels displaying changes in the amplitude of the signal (i.e. Movement Related  
629 Cortical Potentials (MRCP)) we extracted a set of 3 descriptors (absolute mean, variance and  
630 integral) and assigned binary labels to each epoch according to the trial type (0=automatic,  
631 1=switch). Further, we applied a classification method based on the Linear Discriminant Analysis  
632 (LDA) (68). 100 cross-validation steps were performed to assess performance with Fishers F1 score



633 on class-balanced bootstraps of data samples (80% training, 20% testing). The channels providing  
634 the highest classification accuracy were finally selected as the task-related channels. Note that this  
635 analysis was naive with regards to the electrode location or the polarity of the event. This step  
636 allowed us to narrow down our analysis to those contact points that displayed a task-related change  
637 in the amplitude (a detectable difference between conditions) for each subject.  
638 Spectral analysis revealed the presence of MRCPs in the low-frequency range between 1 and 2 Hz  
639 (not shown). Trial-by-trial MRCP peaks in the switch condition were therefore identified by low-  
640 passing the signal up to 2 Hz using a two-ways zero-phase FIR filter and applying a peak detection  
641 algorithm that estimated the time of the absolute peak amplitude in the interval between stimulus  
642 presentation (switch-cue) and the response. Single-trial stimulus-peak interval, as well as peak-  
643 response interval, were further calculated by subtracting the stimulus presentation time from the  
644 peak time and the peak time from the response time respectively.  
645 Finally, the statistical analysis of amplitude differences was performed through a T-statistics one-  
646 dimensional non-parametric cluster based permutation test (30) as implemented in the MNE toolbox  
647 with cluster significance threshold = 0.05 and number of permutations = 1000.

648

649

## 650 **Spectral Analysis**

651

652 Spectral analyses were performed using a DPSS multi-taper method (69,70) as implemented in the  
653 MNE toolbox. Trials were aligned to the relative MRCPs peak time, rather than to the behavioral  
654 response, in order to avoid artifacts due to the averaging temporally variable signal (19). Changes in  
655 the power with respect to the baseline were computed by z-transforming the power spectrum.  
656 Statistical differences in the time-frequency power between conditions were calculated through T-  
657 statistics two-dimensional cluster based permutation analysis as implemented in the MNE toolbox  
658 setting cluster significance threshold = 0.05 and number of permutations = 1000 (30).

659

660

## 661 **Inter-trial phase coherence (ITPC)**

662

663 We estimated inter-trial phase coherence to quantify the frequency-dependent synchronization  
664 across MRCP peak-aligned trials through Phase Locking Value (PLV) method (71). ITPC is computed  
665 as:

666

$$ITPC = \frac{1}{N} \left| \sum_{n=1}^N e^{j\phi_n} \right|$$

667

668 where  $N$  is the number of trials in one condition and  $\phi$  represents the phase estimate at the  $n^{\text{th}}$  trial.  
669 ITPC is bounded between 0 and 1, where 1 represents full phase synchronization. In order to test  
670 differences in ITPC between conditions, we used the cluster-based permutations method proposed  
671 by (30). First, we applied a z-transform to the difference in coherence between conditions ( $Z_{ITPC}$ ) that  
672 rendered the distribution approximately normal (72):

673

$$Z_{ITPC} = \frac{(\tanh^{-1}(|ITPC_1|) - (1/df_1 - 2)) - (\tanh^{-1}(|ITPC_2|) - (1/df_2 - 2))}{\sqrt{(1/df_1 - 2) + (1/df_2 - 2)}}$$

674

675

676 Where  $ITPC_i$  and  $df_i$  represent the inter-trial phase coherence and degrees of freedom for the  $i^{\text{th}}$   
677 condition respectively. To account for the positive bias of ITPC, we used the same amount of trials for  
678 the two conditions compared. Second, we selected those regions where  $z > 2.58$  corresponding to the  
679 99th percentile of the distribution. Finally, we assessed the significance of the measured difference  
680 against the  $H_0$  obtained by computing the coherence difference between surrogate groups  
681 constructed by permuting 1000 times the original labels and extracting the resulting Montecarlo P  
682 value.

683

684

### 685 **Single trial ITPC**

686

687 ITPC is by definition an average measure across multiple trials. An estimate of the contribution of the  
688 single trial to the average ITPC (STPC), however, can be obtained by computing the difference  
689 between the ITPC across all trials and the ITPC across all but one trial following the method proposed  
690 by (23) and previously applied by (22). The Single Trial ITPC ( $STPC_i$ ) for the  $i^{\text{th}}$  trial is computed as  
691 follows:

692

$$STPC_i = N Z_{itpc}^{all} - (N - 1) Z_{itpc}^{all-i}$$

693

694 where  $N$  is the number of trials and  $Z_{itpc}^{all}$  and  $Z_{itpc}^{all-1}$  are the z-transformed ITPCs for all trials and all  
695 but the  $i^{\text{th}}$  trial respectively. Finally, we computed the STPC for each trial and time-frequency bin.

696 The correlation coefficient between STPC and single trial reaction times was calculated using the  
697 Spearman's R, as the STPC distribution was found to violate the normality assumption. This  
698 operation was repeated in order to cover the whole time-frequency range, resulting in an R map of  
699 size time - frequency.

700 To further compute the statistical significance of the obtained R map and to correct for multiple  
701 comparisons we applied cluster permutation analysis for each subject. In brief, for each bin we  
702 randomly shuffled the data on both the reaction time and the STPC dimensions and recomputed at  
703 each permutation the Spearman's R for a total of 1000 permutations. For each bin we obtained a  
704 distribution of R under random condition, which served to set the threshold of significance to the  
705 99% percentile of the distribution, corresponding to a p value of 0.01. Further, each randomly  
706 obtained R map was thresholded according to the corresponding significant value, so to obtain a  
707 number of time-frequency clusters where the correlation coefficient was found significant. To  
708 determine whether the thresholded time-frequency clusters obtained from the experimental  
709 condition could be considered statistically significant we compared their magnitude with the ones  
710 resulted from the permutation analysis. To this end, for each cluster we integrated the absolute R  
711 value so to obtain one magnitude value per cluster. Further we computed the distribution of cluster  
712 magnitudes under random condition and calculated its 99% percentile, corresponding to a p value of  
713 0.01. Cluster magnitudes in the experimental condition that exceeded this threshold were considered  
714 statistically significant. Whole brain maps were obtained by projecting the average z score of those  
715 individual contact points showing a significant cluster in the time window between -0.6 and 0.4 s in  
716 the MNI space.

717

### 718 **Phase-amplitude coupling (PAC)**

719

720 PAC is a measure that quantifies the modulatory effect of low-frequency phase on higher frequency  
721 amplitude as a signature of the interaction between their underlying processes resonating at  
722 different frequency bands. PAC was computed through the Generalized Linear Models (GLM) method  
723 (37) that captures the proportion of variance explained by an underlying linear relationship between  
724 analytical amplitude (i.e. envelope, modulated) and phase (modulating) as obtained by Hilbert  
725 transforming the signal, using the PACpy toolbox (<https://github.com/voytekresearch/pacpy>).

726 We restricted our analysis of PAC to the ROIs emerged from cluster-based permutation analysis and  
727 selected as modulatory frequency band the significant frequency domain range for each subject. Our  
728 epoch selection was also restricted to the temporal window of approximately 400 ms where a  
729 significant increase in phase alignment was detected. For each subject, we obtained one surrogate  
730 signal for fast and slow trials by concatenating the respective single trial windows, so to achieve the  
731 temporal resolution necessary for this type of analysis. Further, we computed PAC values between  
732 the selected modulatory phase and the amplitude of higher frequencies (10-100 Hz in steps of 2 Hz,  
733 modulated frequency), and obtained the difference between the two conditions.

734 Statistical significance between the two conditions was tested through z-statistics against the null-  
735 hypothesis of samples from both conditions belonging to the same distribution. This was obtained by  
736 randomly permuting the conditions' labels and calculating the 95 percentile of the maximum PAC

737 value achieved under the assumption that the two conditions were sampled from the same  
738 distribution (38). Note that this approach could introduce spurious oscillations as an artifact due to  
739 the concatenation of several signals, where the frequency of the oscillation is directly proportional to  
740 the length of the segments concatenated. We control for this possibility by choosing temporal  
741 windows that may introduce artifacts at lower frequencies than those considered in this analysis. In  
742 addition, the same concatenation is applied equally for both conditions and therefore it is unlikely to  
743 affect the comparison.

744

745

#### 746 **ACKNOWLEDGMENTS**

747

748 We thank the patients at the Hospital del Mar - Epilepsy Unit for participating as subjects in the study  
749 and the Hospital del Mar - Epilepsy Unit staff for providing valuable technical support during the  
750 experiments. This work was supported by the H2020 Research and Innovation grant “Virtual Brain  
751 Cloud” (826421). RR and RZ were supported by the project “Clúster Emergent del Cervell Humà”  
752 (CECH) ref. 001-P-001682. ATC was supported by the Bial Foundation grant 106/18.

753

754

755

#### 756 **COMPETING INTERESTS**

757

758 The authors declare no competing interests

759

#### 760 **REFERENCES**

761

- 762 1. Rushworth MFS, Hadland KA. Role of the Human Medial Frontal Cortex in Task Switching: A  
763 Combined fMRI and TMS Study. *J ....* 2002;2577–92.
- 764 2. Rushworth MFS, Walton ME, Kennerley SW, Bannerman DM. Action sets and decisions in the  
765 medial frontal cortex. *Trends Cogn Sci. Thieme*; 2004 Sep;8(9):410–7.
- 766 3. Nachev P, Kennard C, Husain M. Functional role of the supplementary and pre-supplementary  
767 motor areas. *Nat Rev Neurosci.* 2008;9(11):856–69.
- 768 4. Hikosaka O, Isoda M. Switching from automatic to controlled behavior: cortico-basal ganglia  
769 mechanisms. *Trends Cogn Sci. Elsevier Ltd*; 2010;14(4):154–61.
- 770 5. Sakai K. Task Set and Prefrontal Cortex. *Annu Rev Neurosci. Annual Reviews* ; 2008 Jul  
771 17;31(1):219–45.
- 772 6. Isoda M, Hikosaka O. Switching from automatic to controlled action by monkey medial frontal  
773 cortex. *Nat Neurosci. Nature Publishing Group*; 2007 Feb;10(2):240–8.

- 774 7. Roberts RE, Husain M. A dissociation between stopping and switching actions following a  
775 lesion of the pre-supplementary motor area. *Cortex*. Elsevier Ltd; 2015;63:184–95.
- 776 8. Cohen MX, Cavanagh JF. Single-trial regression elucidates the role of prefrontal theta  
777 oscillations in response conflict. *Front Psychol*. 2011;2(FEB):1–12.
- 778 9. Cavanagh JF, Frank MJ. Frontal theta as a mechanism for cognitive control. *Trends Cogn Sci*.  
779 Elsevier Ltd; 2014;18(8):414–21.
- 780 10. Narayanan NS, Cavanagh JF, Frank MJ, Laubach M. Common medial frontal mechanisms of  
781 adaptive control in humans and rodents. *Nat Neurosci*. Nature Publishing Group;  
782 2013;16(12):1888–95.
- 783 11. Helfrich RF, Knight RT. Oscillatory Dynamics of Prefrontal Cognitive Control. *Trends Cogn Sci*.  
784 Elsevier Ltd; 2016;20(12):916–30.
- 785 12. Voytek B, Kayser AS, Badre D, Fegen D, Chang EF, Crone NE, et al. Oscillatory dynamics  
786 coordinating human frontal networks in support of goal maintenance. *Nat Neurosci*. Nature  
787 Publishing Group; 2015;18(9):1318–24.
- 788 13. Smith EH, Horga G, Yates MJ, Mikell CB, Banks GP, Pathak YJ, et al. Widespread temporal  
789 coding of cognitive control in the human prefrontal cortex. *Nat Neurosci*. Nature Publishing  
790 Group; 2019 Nov 30;22(11):1883–91.
- 791 14. Sweeney-Reed CM, Zaehle T, Voges J, Schmitt FC, Buentjen L, Kopitzki K, et al. Thalamic theta  
792 phase alignment predicts human memory formation and anterior thalamic cross-frequency  
793 coupling. *Elife*. eLife Sciences Publications Limited; 2015 May 20;4:e07578.
- 794 15. Szczepanski SM, Crone NE, Kuperman RA, Auguste KI, Parvizi J, Knight RT. Dynamic Changes  
795 in Phase-Amplitude Coupling Facilitate Spatial Attention Control in Fronto-Parietal Cortex.  
796 *PLoS Biol*. 2014;12(8).
- 797 16. Phillips JM, Vinck M, Everling S, Womelsdorf T. A long-range fronto-parietal 5- to 10-Hz  
798 network predicts “top-down” controlled guidance in a task-switch paradigm. *Cereb Cortex*.  
799 2014;24(8):1996–2008.
- 800 17. Nissen MJ, Bullemer P. Attentional requirements of learning: Evidence from performance  
801 measures. *Cogn Psychol*. 1987 Jan;19(1):1–32.
- 802 18. Hallett M. Movement-related cortical potentials. *Electromyogr Clin Neurophysiol*.  
803 1994;34(1):5–13.
- 804 19. van Diepen RM, Mazaheri A. The Caveats of observing Inter-Trial Phase-Coherence in  
805 Cognitive Neuroscience. *Sci Rep*. Nature Publishing Group; 2018 Dec 14;8(1):2990.
- 806 20. Alexander DM, Jurica P, Trengove C, Nikolaev AR, Gepshtein S, Zvyagintsev M, et al. Traveling  
807 waves and trial averaging: The nature of single-trial and averaged brain responses in large-  
808 scale cortical signals. *Neuroimage*. 2013 Jun;73:95–112.
- 809 21. Zhang H, Watrous AJ, Patel A, Jacobs J, Zhang H, Watrous AJ, et al. Theta and Alpha Oscillations  
810 Are Traveling Waves in the Human Neocortex Article Theta and Alpha Oscillations Are

- 811           Traveling Waves in the Human Neocortex. *Neuron*. Elsevier; 2018;98(6):1269–1281.e4.
- 812   22.   Hipp JF, Engel AK, Siegel M. Oscillatory Synchronization in Large-Scale Cortical Networks  
813           Predicts Perception. *Neuron*. 2011 Jan 27;69(2):387–96.
- 814   23.   Jarvis MR, Mitra PP. Sampling properties of the spectrum and coherency of sequences of  
815           action potentials. *Neural Comput*. 2001 Apr;13(4):717–49.
- 816   24.   Lisman JE, Jensen O. The  $\theta$ - $\gamma$  neural code. *Neuron*. NIH Public Access; 2013 Mar  
817           20;77(6):1002–16.
- 818   25.   Lee D. Behavioral context and coherent oscillations in the supplementary motor area. *J*  
819           *Neurosci*. Society for Neuroscience; 2004 May 5;24(18):4453–9.
- 820   26.   Sakai K, Hikosaka O, Nakamura K. Emergence of rhythm during motor learning. *Trends Cogn*  
821           *Sci*. 2004;8(12):547–53.
- 822   27.   Tanji J. Sequential Organization of Multiple Movements: Involvement of Cortical Motor Areas.  
823           *Annu Rev Neurosci*. 2001;24(1):631–51.
- 824   28.   Karimi F, Kofman J, Mrachacz-Kersting N, Farina D, Jiang N. Detection of Movement Related  
825           Cortical Potentials from EEG Using Constrained ICA for Brain-Computer Interface  
826           Applications. *Front Neurosci*. Frontiers Media SA; 2017;11:356.
- 827   29.   Lopour BA, Tavassoli A, Fried I, Ringach DL. Coding of Information in the Phase of Local Field  
828           Potentials within Human Medial Temporal Lobe. *Neuron*. Cell Press; 2013 Aug 7;79(3):594–  
829           606.
- 830   30.   Maris E, Schoffelen J-M, Fries P. Nonparametric statistical testing of coherence differences. *J*  
831           *Neurosci Methods*. 2007 Jun;163(1):161–75.
- 832   31.   Mansouri FA, Tanaka K, Buckley MJ. Conflict-induced behavioural adjustment: A clue to the  
833           executive functions of the prefrontal cortex. *Nature Reviews Neuroscience*. Nature Publishing  
834           Group; 2009. p. 141–52.
- 835   32.   Murty VP, LaBar KS, Adcock RA. Distinct medial temporal networks encode surprise during  
836           motivation by reward versus punishment. *Neurobiol Learn Mem*. Academic Press Inc.; 2016  
837           Oct 1;134(Part A):55–64.
- 838   33.   Berkers RMWJ, Klumpers F, Fernández G. Medial prefrontal–hippocampal connectivity during  
839           emotional memory encoding predicts individual differences in the loss of associative memory  
840           specificity. *Neurobiol Learn Mem*. Academic Press Inc.; 2016 Oct 1;134:44–54.
- 841   34.   Minxha J, Adolphs R, Fusi S, Mamelak AN, Rutishauser U. Flexible recruitment of memory-  
842           based choice representations by the human medial frontal cortex. *Science (80- )*. American  
843           Association for the Advancement of Science; 2020 Jun 26;368(6498).
- 844   35.   Canolty RT, Knight RT. The functional role of cross-frequency coupling. *Trends Cogn Sci*. 2010  
845           Nov;14(11):506–15.
- 846   36.   Hyafil A, Giraud AL, Fontolan L, Gutkin B. Neural Cross-Frequency Coupling: Connecting  
847           Architectures, Mechanisms, and Functions. *Trends Neurosci*. Elsevier Ltd; 2015;38(11):725–



- 848 40.
- 849 37. Penny WD, Duzel E, Miller KJ, Ojemann JG. Testing for nested oscillation. *J Neurosci Methods*.  
850 2008 Sep 15;174(1):50–61.
- 851 38. Maris E, Oostenveld R. Nonparametric statistical testing of EEG- and MEG-data. *J Neurosci*  
852 *Methods*. 2007 Aug 15;164(1):177–90.
- 853 39. Moissello C, Crupi D, Tunik E, Quartarone A, Bove M, Tononi G, et al. The serial reaction time  
854 task revisited: A study on motor sequence learning with an arm-reaching task. *Exp Brain Res*.  
855 2009;194(1):143–55.
- 856 40. Keele SW, Ivry R, Mayr U, Hazeltine E, Heuer H. The cognitive and neural architecture of  
857 sequence representation. *Psychol Rev*. 2003;110(2):316–39.
- 858 41. Crone EA, Wendelken C, Donohue SE, Bunge SA. Neural evidence for dissociable components  
859 of task-switching. *Cereb Cortex*. 2006;16(4):475–86.
- 860 42. Monsell S. Task switching. *Trends Cogn Sci*. 2003;7(3):134–40.
- 861 43. Buzsáki G, Anastassiou CA, Koch C. The origin of extracellular fields and currents — EEG ,  
862 ECoG , LFP and spikes. *Nature Publishing Group*; 2012;13(June):407–20.
- 863 44. Sumner P, Nachev P, Morris P, Peters AM, Jackson SR, Kennard C, et al. Human Medial Frontal  
864 Cortex Mediates Unconscious Inhibition of Voluntary Action. *Neuron*. Elsevier Inc.;  
865 2007;54(5):697–711.
- 866 45. RUSHWORTH M, WALTON M, KENNERLEY S, BANNERMAN D. Action sets and decisions in  
867 the medial frontal cortex. *Trends Cogn Sci*. 2004 Sep;8(9):410–7.
- 868 46. Rushworth MFS, Hadland KA, Paus T, Sipila PK. Role of the Human Medial Frontal Cortex in  
869 Task Switching: A Combined fMRI and TMS Study. *J Neurophysiol*. 2002 May;87(5):2577–92.
- 870 47. Kornhuber HH, Deecke L. Hirnpotentialänderungen bei Willkürbewegungen und passiven  
871 Bewegungen des Menschen: Bereitschaftspotential und reafferente Potentiale. *Pflugers Arch*  
872 *Gesamte Physiol Menschen Tiere*. 1965;284(1):1–17.
- 873 48. Shibasaki H, Hallett M. What is the Bereitschaftspotential? *Clinical Neurophysiology*. *Clin*  
874 *Neurophysiol*; 2006. p. 2341–56.
- 875 49. Colebatch SKJG. Movement-related potentials associated with self-paced , cued and imagined  
876 arm movements. 2002;98–107.
- 877 50. Schurger A, Mylopoulos M, Rosenthal D. Neural Antecedents of Spontaneous Voluntary  
878 Movement: A New Perspective. *Trends Cogn Sci*. Elsevier; 2016 Feb 1;20(2):77–9.
- 879 51. LIBET B, GLEASON CA, WRIGHT EW, PEARL DK. TIME OF CONSCIOUS INTENTION TO ACT IN  
880 RELATION TO ONSET OF CEREBRAL ACTIVITY (READINESS-POTENTIAL). *Brain*. 1983  
881 Sep;106(3):623–42.
- 882 52. Schurger A, Sitt JD, Dehaene S. An accumulator model for spontaneous neural activity prior to  
883 self-initiated movement. *Proc Natl Acad Sci U S A*. National Academy of Sciences; 2012 Oct  
884 16;109(42):E2904-13.

- 885 53. Delorme A, Westerfield M, Makeig S. Medial Prefrontal Theta Bursts Precede Rapid Motor  
886 Responses during Visual Selective Attention. *J Neurosci*. 2007;27(44):11949–59.
- 887 54. Ramchurn A, de Fockert JW, Mason L, Darling S, Bunce D. Intraindividual reaction time  
888 variability affects P300 amplitude rather than latency. *Front Hum Neurosci*. *Frontiers*; 2014  
889 Jul 29;8:557.
- 890 55. Swick D, Turken U. Dissociation between conflict detection and error monitoring in the  
891 human anterior cingulate cortex. *Proc Natl Acad Sci U S A*. *National Academy of Sciences*;  
892 2002 Dec 10;99(25):16354–9.
- 893 56. Picard N, Strick PL. Motor areas of the medial wall: A review of their location and functional  
894 activation. *Cerebral Cortex*. *Cereb Cortex*; 1996. p. 342–53.
- 895 57. Rizzuto DS, Madsen JR, Bromfield EB, Schulze-Bonhage A, Seelig D, Aschenbrenner-Scheibe R,  
896 et al. Reset of human neocortical oscillations during a working memory task. *Proc Natl Acad  
897 Sci U S A*. *National Academy of Sciences*; 2003 Jun 24;100(13):7931–6.
- 898 58. Voloh B, Valiante TA, Everling S, Womelsdorf T. Theta-gamma coordination between anterior  
899 cingulate and prefrontal cortex indexes correct attention shifts. *Proc Natl Acad Sci U S A*.  
900 *National Academy of Sciences*; 2015 Jul 7;112(27):8457–62.
- 901 59. Fell J, Axmacher N. The role of phase synchronization in memory processes. *Nat Rev Neurosci*.  
902 2011 Feb 20;12(2):105–18.
- 903 60. Zavala B, Tan H, Ashkan K, Foltynie T, Limousin P, Zrinzo L, et al. Human subthalamic nucleus-  
904 medial frontal cortex theta phase coherence is involved in conflict and error related cortical  
905 monitoring. *Neuroimage*. *The Authors*; 2016;137:178–87.
- 906 61. Muller L, Chavane F, Reynolds J, Sejnowski TJ. Cortical travelling waves: mechanisms and  
907 computational principles. *Nat Rev Neurosci*. *Nature Publishing Group*; 2018 May  
908 22;19(5):255–68.
- 909 62. Isoda M, Hikosaka O. Role for subthalamic nucleus neurons in switching from automatic to  
910 controlled eye movement. *J Neurosci*. *Society for Neuroscience*; 2008 Jul 9;28(28):7209–18.
- 911 63. Cohen MX. A neural microcircuit for cognitive conflict detection and signaling. *Trends  
912 Neurosci*. *Elsevier Ltd*; 2014;37(9):480–90.
- 913 64. Jasinska AJ. Automatic inhibition and habitual control : alternative views in neuroscience  
914 research on response inhibition and inhibitory control INHIBITION CAN BE EITHER A  
915 CONTROL PROCESS ( TO OVERRIDE A PREPOTENT RESPONSE TENDENCY ) PROCESSES  
916 MEDIATING RESPONSE INHI. 2013;7(April):1–4.
- 917 65. Kenner NM, Mumford JA, Hommer RE, Skup M, Leibenluft E, Poldrack RA. Inhibitory motor  
918 control in response stopping and response switching. *J Neurosci*. *Society for Neuroscience*;  
919 2010 Jun 23;30(25):8512–8.
- 920 66. Fedorov A, Beichel R, Kalpathy-Cramer J, Finet J, Fillion-Robin J-C, Pujol S, et al. 3D Slicer as an  
921 image computing platform for the Quantitative Imaging Network. *Magn Reson Imaging*. 2012

- 922 Nov;30(9):1323–41.
- 923 67. Fischl B. FreeSurfer. *Neuroimage*. 2012 Aug 15;62(2):774–81.
- 924 68. Blankertz B, Lemm S, Treder M, Haufe S, Müller K-R. Single-trial analysis and classification of  
925 ERP components — A tutorial. *Neuroimage*. 2011 May 15;56(2):814–25.
- 926 69. Mitra PP, Pesaran B. Analysis of Dynamic Brain Imaging Data. *Biophys J*. 1999 Feb;76(2):691–  
927 708.
- 928 70. Thomson DJ. Spectrum estimation and harmonic analysis. *Proc IEEE*. 1982;70(9):1055–96.
- 929 71. Lachaux J-P, Rodriguez E, Martinerie J, Varela FJ. Measuring phase synchrony in brain signals.  
930 *Hum Brain Mapp*. John Wiley & Sons, Ltd; 1999 Jan 1;8(4):194–208.
- 931 72. Enochson LD, Goodman NR. CeqQ GAUSSIAN APPROXIMATIONS TO THE DISTRIBUTION OF  
932 SAMPLE COHERENCE. 1965 Jun.
- 933
